# Supplementary material for: Ago2 protects Drosophila siRNAs and microRNAs from target-directed degradation, even in the absence of 2′-O-methylation
Source: RNA. 2021 Jun;27(6):710–24. doi: 10.1261/rna.078746.121 (PMC8127995; doi:10.1261/rna.078746.121)
Supplement: Supplemental Material [file supp_078746.121_Supplemental_Table_S1.xlsx]

## Sheet: miRNA_FC_summary_table
Supplemental Table S1. Fold-changes in miRNAs observed upon loss of Dora in different contexts.
Log2 fold-changes (FC) upon loss of Dora and the associated adjusted p values (padj), as determined by DESeq2, are tabulated for libraries from total sRNA samples (total), periodate-treated sRNA samples (tr), and Ago1 IP samples (Ago1), and libraries from Ago2 IP carried out in the hen1 background (Ago2). miRNAs used for siRNA normalization for either total sRNA libraries, Ago1 co-IP libraries, a…
miRNA	total.FC	total.padj	tr.FC	tr.padj	Ago1.FC	Ago1.padj	Ago2.FC	Ago2.padj	norm1	norm2
dme-bantam-3p	-0.108026	0.653751	-0.32163	0.421844	-0.840791	3.32911e-14	-0.420491	0.000574386	TRUE	FALSE
dme-bantam-5p	-0.0499034	0.765238	0.222875	0.116983	-0.189459	0.180708	-0.00716642	0.951864	FALSE	TRUE
dme-miR-1002-5p	1.26911	1.44674e-08	NA	NA	1.27254	2.85271e-11	NA	NA	FALSE	FALSE
dme-miR-1003-3p	-0.574986	0.000258483	-0.489227	0.0671587	-0.788082	3.09014e-19	0.0720669	0.637509	TRUE	FALSE
dme-miR-1005-3p	-0.921024	0.0559783	NA	NA	0.0797104	0.743948	-0.202034	0.673935	FALSE	FALSE
dme-miR-1006-3p	-0.623908	0.00286345	-0.265635	0.597158	-0.711015	3.67817e-11	-0.183444	0.502494	FALSE	FALSE
dme-miR-1007-3p	-0.873111	0.000180622	-0.0272874	0.979697	-0.707516	0.00197793	NA	NA	FALSE	FALSE
dme-miR-1008-3p	-1.03367	0.00655789	-1.08131	0.0584286	-0.730767	5.90964e-13	-0.834092	0.0381814	FALSE	FALSE
dme-miR-1009-3p	-1.69932	5.06546e-06	NA	NA	-1.28615	3.46864e-07	NA	NA	FALSE	FALSE
dme-miR-1012-3p	3.34315	5.42343e-09	0.524959	0.378777	NA	NA	NA	NA	FALSE	FALSE
dme-miR-11-3p	0.0195621	0.939519	0.314906	0.102714	-0.216243	0.124886	0.121484	0.159533	FALSE	FALSE
dme-miR-11-5p	0.18189	0.365252	0.270622	0.279013	0.0052904	0.977742	-0.0317228	0.862789	FALSE	FALSE
dme-miR-12-3p	0.881269	0.0192626	1.11005	0.00671981	0.864585	0.0272263	-0.0785527	0.79673	FALSE	FALSE
dme-miR-12-5p	4.00846	3.723e-26	0.787383	0.0391066	5.6859	4.43052e-93	0.310828	0.161332	FALSE	FALSE
dme-miR-13a-3p	0.13219	0.816319	NA	NA	-0.295584	0.18232	NA	NA	FALSE	FALSE
dme-miR-13b-2-5p	0.417206	0.0861477	0.593254	0.0333447	-0.0956753	0.577078	0.381593	0.013684	FALSE	TRUE
dme-miR-13b-3p	0.040443	0.851456	0.276631	0.3201	-0.322905	0.0327483	0.281916	0.0727413	FALSE	FALSE
dme-miR-14-3p	0.000183518	0.999035	-0.282185	0.39649	-0.2034	0.091544	-0.154974	0.356311	TRUE	FALSE
dme-miR-14-5p	-0.0307352	0.914959	0.256523	0.212711	-0.299777	0.226436	0.370682	0.0574742	FALSE	FALSE
dme-miR-184-3p	0.66396	0.0220224	0.315148	0.0620213	0.230369	0.134218	0.0553336	0.736481	TRUE	FALSE
dme-miR-184-5p	0.482917	0.0107573	0.489631	0.0899212	0.407929	0.159653	-0.0173104	0.911212	FALSE	TRUE
dme-miR-190-3p	-0.00562153	0.983002	0.0240037	0.904605	-0.461711	0.00013311	0.0612281	0.546345	FALSE	FALSE
dme-miR-190-5p	2.72813	2.66314e-87	0.105475	0.532536	4.63899	0	0.12064	0.121716	FALSE	FALSE
dme-miR-2279-3p	-0.530296	0.240193	NA	NA	-0.795874	0.000871792	NA	NA	FALSE	FALSE
dme-miR-2279-5p	-0.233474	0.533117	-0.220991	0.378844	NA	NA	-0.331419	0.244434	FALSE	FALSE
dme-miR-252-5p	-2.01968	4.97293e-06	-2.01039	1.43083e-05	NA	NA	-1.45119	0.00237111	FALSE	FALSE
dme-miR-263a-5p	0.713225	0.00188472	0.504721	0.0522248	1.21511	9.2385e-06	0.270374	0.150273	FALSE	FALSE
dme-miR-275-3p	0.910995	0.000478783	-0.000568561	0.998084	0.621875	1.95191e-06	0.518811	0.00101895	FALSE	FALSE
dme-miR-275-5p	0.109339	0.669796	0.00479234	0.982888	1.34325	2.12096e-11	0.0624626	0.786859	FALSE	FALSE
dme-miR-276a-3p	0.290163	0.390121	0.0941339	0.749838	0.399433	0.104477	0.22424	0.274529	TRUE	FALSE
dme-miR-277-3p	1.69905	8.35741e-15	-0.104616	0.575832	2.50294	1.02459e-44	0.22564	0.2231	FALSE	FALSE
dme-miR-277-5p	0.499574	0.180485	-0.229344	0.572955	-0.0136421	0.951389	-0.291583	0.41077	FALSE	FALSE
dme-miR-278-3p	-2.47504	1.49468e-06	-2.35747	1.35205e-05	NA	NA	NA	NA	FALSE	FALSE
dme-miR-279-3p	2.01852	9.80088e-29	0.140373	0.407574	2.09774	5.27197e-50	-0.157609	0.193176	FALSE	FALSE
dme-miR-279-5p	-0.0197673	0.922702	0.134846	0.811077	-0.0708258	0.831846	0.00312151	0.994814	FALSE	FALSE
dme-miR-281-1-5p	-0.652188	0.0616335	-0.500655	0.249745	-0.29525	0.196233	-0.0477677	0.910022	FALSE	FALSE
dme-miR-281-2-5p	-0.902432	0.000112134	-0.964442	0.0823596	-0.381277	0.112892	-0.0504981	0.901902	FALSE	FALSE
dme-miR-281-3p	-0.721865	0.000415021	-1.28879	0.0379085	-0.21398	0.324296	-0.115675	0.784863	FALSE	FALSE
dme-miR-282-3p	-0.495901	0.0394387	-0.115283	0.611657	-0.263663	0.109022	-0.0518485	0.852153	FALSE	FALSE
dme-miR-282-5p	-0.578025	0.0830254	0.146876	0.389999	-0.395804	0.0311097	-0.670756	0.00875496	TRUE	FALSE
dme-miR-283-3p	1.12121	0.00104305	0.878695	0.078645	NA	NA	-0.00464026	0.987629	FALSE	FALSE
dme-miR-283-5p	1.11933	0.00179179	0.690522	0.0624947	NA	NA	0.15605	0.445469	FALSE	FALSE
dme-miR-2a-1-5p	-0.00797177	0.961484	-0.0590641	0.783495	-0.934832	4.91061e-15	0.0450372	0.565508	FALSE	TRUE
dme-miR-2a-2-5p	-0.274475	0.0707815	-0.355042	0.0985235	-0.376514	0.135356	-0.314247	0.0438478	FALSE	TRUE
dme-miR-2ac-3p	-0.194496	0.214711	-0.0260843	0.932269	-0.431553	0.00098846	0.166391	0.307264	TRUE	FALSE
dme-miR-2b-1-5p	-0.408261	0.343339	0.273648	0.4685	NA	NA	0.324875	0.118993	FALSE	FALSE
dme-miR-2b-2-5p	0.268888	0.189345	0.146203	0.427605	0.246652	0.0343689	0.0268293	0.824138	FALSE	TRUE
dme-miR-2b-3p	0.34083	0.0771151	-0.0239507	0.938458	0.0259243	0.822671	0.177245	0.364098	TRUE	FALSE
dme-miR-304-3p	1.14832	0.00487885	0.733458	0.0788211	1.27037	2.75426e-05	0.481786	0.128051	FALSE	FALSE
dme-miR-304-5p	0.604486	0.0790209	0.0812763	0.862863	0.291438	0.280937	0.132069	0.551899	TRUE	FALSE
dme-miR-305-3p	0.353099	0.287223	0.424621	0.10319	0.374986	0.0144884	0.336729	0.00727164	FALSE	FALSE
dme-miR-305-5p	0.495692	0.00138852	0.0579256	0.725868	0.76049	3.67962e-11	0.0905722	0.238402	FALSE	FALSE
dme-miR-306-3p	-0.322891	0.310552	0.325227	0.265138	-0.242809	0.318287	0.0754658	0.573622	FALSE	FALSE
dme-miR-306-5p	-0.346616	0.226145	-0.345718	0.289656	-0.486229	7.64059e-05	-0.310588	0.128599	TRUE	FALSE
dme-miR-308-3p	-0.700207	8.75597e-05	-0.709407	0.24829	-0.035488	0.805845	-0.230018	0.432289	FALSE	FALSE
dme-miR-308-5p	-0.248552	0.458599	0.0399262	0.868905	0.783215	3.50741e-08	-0.151834	0.188278	FALSE	TRUE
dme-miR-317-3p	0.0962363	0.643164	-0.415001	0.229411	0.0457471	0.737481	-0.0457551	0.74703	TRUE	FALSE
dme-miR-317-5p	0.0225747	0.890513	-0.237536	0.277923	0.355205	0.0229546	-0.176397	0.461133	FALSE	FALSE
dme-miR-318-3p	-0.665021	0.14351	NA	NA	NA	NA	NA	NA	FALSE	FALSE
dme-miR-33-3p	-0.337838	0.0587144	-0.321415	0.0343982	-0.0784803	0.7541	-0.0107022	0.92489	FALSE	FALSE
dme-miR-33-5p	-0.0274768	0.90893	-0.516833	0.0347693	0.626374	9.04211e-08	-0.139344	0.156924	FALSE	FALSE
dme-miR-34-3p	-0.188619	0.249071	-0.000722167	0.998689	-0.372244	0.0109692	-0.162484	0.378211	TRUE	FALSE
dme-miR-34-5p	0.76166	0.000932253	0.20003	0.395474	0.8589	2.24308e-10	0.0619195	0.609572	TRUE	FALSE
dme-miR-4968-3p	-0.397262	0.419442	-0.369292	0.605748	NA	NA	-0.448246	0.559484	FALSE	FALSE
dme-miR-6-3p	-0.453195	0.268336	NA	NA	-0.728761	0.000496876	NA	NA	FALSE	FALSE
dme-miR-7-3p	0.0183761	0.946321	0.12849	0.544724	0.210855	0.401093	-0.145612	0.420791	FALSE	FALSE
dme-miR-7-5p	4.03154	1.88664e-88	0.871673	0.0434895	4.42698	1.5798e-122	1.49272	2.40522e-09	FALSE	FALSE
dme-miR-79-3p	-0.220805	0.120954	-0.262217	0.161687	-0.550978	4.33162e-05	-0.0290559	0.794243	FALSE	FALSE
dme-miR-79-5p	-0.334907	0.173362	NA	NA	NA	NA	NA	NA	FALSE	FALSE
dme-miR-8-3p	0.0424449	0.906577	-0.0314384	0.944627	-0.626913	0.0356895	-0.245209	0.353817	FALSE	FALSE
dme-miR-8-5p	0.124824	0.738457	0.151714	0.704138	-0.24204	0.401152	-0.278662	0.291447	FALSE	TRUE
dme-miR-92b-3p	0.991898	0.0131024	-0.522084	0.531321	NA	NA	-0.692132	0.135519	FALSE	FALSE
dme-miR-9388-3p	-0.418902	0.00619072	-0.233509	0.214233	-0.776772	4.67341e-06	-0.271826	0.012411	FALSE	FALSE
dme-miR-9388-5p	-1.33612	0.000167492	-1.13358	0.000378993	2.14166	6.2541e-23	-0.519921	0.0172043	FALSE	FALSE
dme-miR-965-3p	0.469089	0.145854	0.00909811	0.973829	0.498571	1.2652e-07	0.132673	0.56566	TRUE	FALSE
dme-miR-965-5p	-0.021458	0.935547	0.433912	0.144965	-0.483912	0.0298192	0.58471	0.0672624	FALSE	FALSE
dme-miR-966-5p	-0.63061	0.0662602	-0.408344	0.160453	NA	NA	0.20087	0.596804	FALSE	FALSE
dme-miR-967-5p	-0.959637	0.0121526	-0.745392	0.031332	-0.759547	0.0124274	NA	NA	FALSE	FALSE
dme-miR-968-5p	0.348665	0.0816361	0.231889	0.469158	0.0426073	0.80003	1.00565	0.00156213	FALSE	FALSE
dme-miR-970-3p	0.363564	0.275528	-0.0445001	0.848881	0.624778	0.0216458	0.0492075	0.671678	FALSE	FALSE
dme-miR-970-5p	-0.176308	0.644926	NA	NA	NA	NA	NA	NA	FALSE	FALSE
dme-miR-988-3p	-0.278565	0.0806813	-0.253971	0.15301	-0.458464	1.54427e-07	-0.153258	0.11058	FALSE	FALSE
dme-miR-988-5p	-0.382658	0.0118355	-0.281702	0.0791257	-0.502042	0.183128	-0.0304516	0.770572	FALSE	TRUE
dme-miR-994-5p	0.00565194	0.992912	0.327459	0.565523	NA	NA	NA	NA	FALSE	FALSE
dme-miR-995-3p	-0.287092	0.0689172	-0.317664	0.15119	-0.41457	0.000135817	-0.406335	0.0531831	FALSE	FALSE
dme-miR-995-5p	-0.363459	0.248564	-0.40225	0.121555	NA	NA	-0.596247	0.274861	FALSE	FALSE
dme-miR-996-3p	2.78771	1.0589e-24	-0.0129377	0.964104	3.36836	2.05275e-163	-0.0595444	0.556347	FALSE	FALSE
dme-miR-996-5p	0.0906471	0.632551	0.182447	0.238306	0.0908501	0.68191	0.0263141	0.829307	FALSE	TRUE
dme-miR-998-3p	-0.514365	0.167479	-0.568103	0.16305	-0.616727	0.0913334	-0.594251	0.0307681	TRUE	FALSE
dme-miR-998-5p	-0.754559	0.0379204	-0.472744	0.251427	NA	NA	-0.51597	0.0405581	FALSE	TRUE
dme-miR-999-3p	2.73277	1.22124e-43	-0.0322201	0.883374	2.90805	1.60133e-209	0.139954	0.302465	FALSE	FALSE
dme-miR-999-5p	-0.443244	0.240225	-0.198112	0.79632	NA	NA	0.525072	0.282062	FALSE	FALSE
dme-miR-9b-3p	-0.103932	0.569817	-1.03647	0.282091	-0.542642	0.0011013	0.0606093	0.922122	FALSE	FALSE
dme-miR-9b-5p	2.43847	1.59824e-62	0.399883	0.260542	2.73535	5.17078e-39	0.900841	8.73768e-06	FALSE	FALSE
dme-miR-9c-3p	0.0405401	0.895275	-0.432628	0.513086	0.322448	0.0545807	-0.143601	0.809584	FALSE	FALSE
dme-miR-9c-5p	1.91948	5.98918e-41	0.176074	0.234916	4.01621	1.18848e-166	-0.0493695	0.651862	FALSE	FALSE
dme-miR-2500-5p	NA	NA	NA	NA	NA	NA	-0.55481	0.236653	FALSE	FALSE
dme-miR-2501-5p	NA	NA	NA	NA	NA	NA	-0.342876	0.715502	FALSE	FALSE
dme-miR-276ab-5p	NA	NA	NA	NA	NA	NA	0.166573	0.802872	FALSE	FALSE
dme-miR-307a-3p	NA	NA	NA	NA	NA	NA	0.319207	0.667268	FALSE	FALSE
dme-miR-307a-5p	NA	NA	NA	NA	NA	NA	-0.274963	0.40748	FALSE	FALSE
dme-miR-929-5p	NA	NA	NA	NA	NA	NA	0.903453	0.0441187	FALSE	FALSE
