# Supplementary material for: Ago2 protects Drosophila siRNAs and microRNAs from target-directed degradation, even in the absence of 2′-O-methylation
Source: RNA. 2021 Jun;27(6):710–24. doi: 10.1261/rna.078746.121 (PMC8127995; doi:10.1261/rna.078746.121)
Supplement: Supplemental Material [file supp_078746.121_Supplemental_Table_S2.xlsx]

## Sheet: Legend
Supplemental Table S2. Normalized levels of the 21 most abundant siRNAs in each sRNA-seq library.
Each tab in this file pertains to one of the following datasets: total-sRNA libraries (total), periodate-treated libraries (treated), Ago1 IP libraries (Ago1), libraries from Ago2 IP carried out in the hen1 background (Ago2), and total-sRNA libraries from the hen1 background (hen1). Each sample is described by the gene targeted by the gRNA(s) used to generate that line (scr, scrambled, non-target…

## Sheet: total
siRNA	scr_1	scr_2	scr_3	dora_1	dora_2	dora_3
CG4068_1	21953	22313.3	36040.9	7740.95	15366	22924.6
CG4068_2	1781	1324.77	3058.28	738.347	903.776	792.113
CR18854_1	2016	2041.02	2110.67	1565.16	2233.23	2960.22
CR18854_2	2319	2400.09	2740.59	972.196	2422.12	3506.62
CG4068_3	2398	1947.48	3711.39	1937.87	1644.87	2748.66
CG4068_4	1346	859.875	2242.92	576.103	780.863	1019.5
CR18854_3	1256	1235.95	1911.6	670.73	1216.48	1762.47
CR18854_4	978	960.036	1532.55	741.247	1096.28	1293.54
CG4068_5	1171	1150.91	2023.4	377.965	805.265	1291.04
CG4068_6	1004	1056.42	1884.33	460.266	869.433	1279.38
CR18854_5	741	818.299	1047.15	592.055	673.313	789.615
CR18854_6	826	938.303	1115.33	606.195	742	924.549
transposon_1	824	740.815	785.364	719.857	736.578	680.501
transposon_2	928	887.278	744.46	1019.33	1114.36	785.45
transposon_3	891	766.328	800.363	402.801	972.463	780.452
transposon_4	737	821.133	685.83	721.669	993.25	669.673
transposon_7	609	517.815	538.574	433.618	526.902	420.628
transposon_8	353	467.734	549.482	571.752	557.63	270.701
transposon_9	536	418.599	520.849	354.037	666.987	454.778
transposon_5	464	409.149	409.044	229.498	614.568	472.269
transposon_6	494	548.052	605.385	523.895	712.176	396.473

## Sheet: treated
siRNA	scr_1	scr_2	scr_3	dora_1	dora_2	dora_3
CG4068_1	32941	32141.4	41333.2	34772.3	29820.6	46139.6
CG4068_2	4770	2657.09	5225.97	1806.86	1495.34	2365.42
CR18854_1	3238	3401.45	3835.51	3906.84	2796.11	4451.98
CR18854_2	3119	3131.7	3947.98	1562.97	2703	4642.51
CG4068_3	3191	2390.71	4187.55	3009.86	1859.44	3428.15
CG4068_4	2833	1753.41	3697.62	865.321	967.244	1826.81
CR18854_3	2602	2534.86	2682.31	2000.32	2315.27	3301.57
CR18854_4	2361	2453.93	2882.6	2194.96	2087.36	3033.91
CG4068_5	2357	2106.62	2985.83	1092.79	1734.83	3037.21
CG4068_6	1444	1364.8	2169.27	1531.31	1326.25	2101.72
CR18854_5	1069	1340.35	1243.32	1540.69	963.538	1349.5
CR18854_6	1018	1331.92	1163.21	1675.53	993.649	1390.38
transposon_1	1340	1153.21	1189.4	1585.25	1080.27	1004.05
transposon_2	1358	1208.84	1223.3	1448.06	1513.87	1149.75
transposon_3	1096	1055.42	1013.76	1218.25	1369.8	1029.76
transposon_4	1083	959.319	932.878	1215.91	1316.53	890.001
transposon_7	935	780.606	818.868	872.356	721.264	651.349
transposon_8	746	800.837	877.414	865.321	905.633	847.149
transposon_9	859	782.292	767.256	975.538	1084.91	788.475
transposon_5	945	864.061	936.73	994.299	1219.25	989.549
transposon_6	783	850.573	883.577	1275.7	1025.15	857.038

## Sheet: Ago1
siRNA	scr_1	scr_2	scr_3	dora_1	dora_2	dora_3
CG4068_1	522	595.012	655.521	2005.21	1743.13	3067.23
CG4068_2	443	410.402	500.451	1981.63	1749.96	2566.33
CR18854_1	33	69.5838	55.5078	51.8753	47.8506	147.326
CR18854_2	116	137.748	112.778	863.959	770.926	1154.85
CG4068_3	112	161.889	197.361	124.501	113.93	375.444
CG4068_4	1045	739.86	1118.97	3506.77	2899.9	5397.84
CR18854_3	20	32.6618	31.7187	119.785	105.575	151.128
CR18854_4	157	180.35	184.145	205.615	164.059	325.068
CG4068_5	50	34.0819	47.5781	154.683	111.651	235.722
CG4068_6	319	347.919	458.16	1092.21	883.337	1550.25
CR18854_5	22	48.2826	19.3837	22.6365	25.0646	67.4849
CR18854_6	44	75.2641	44.9349	54.7048	46.3315	102.653
transposon_1	28	58.2232	33.4809	31.1252	30.3813	64.6334
transposon_2	20	48.2826	33.4809	33.9547	34.9385	53.2275
transposon_3	10	22.7212	28.1944	12.2614	23.5455	32.3167
transposon_4	37	63.9035	42.2917	33.0115	50.1292	86.4947
transposon_7	27	53.9629	30.8377	21.6933	22.786	57.98
transposon_8	21	51.1228	31.7187	29.2388	22.786	50.376
transposon_9	6	17.0409	14.9783	6.60231	6.83579	7.60393
transposon_5	12	26.9815	6.16753	9.43187	13.6716	24.7128
transposon_6	33	63.9035	34.362	34.8979	44.0529	84.5937

## Sheet: Ago2
siRNA	hen1_1	hen1_2	hen1_3	hen1dora_1	hen1dora_2	hen1dora_3
CG4068_1	15975	10704.7	15168.3	14935.4	11049.9	14493.6
CG4068_2	3982	2784.25	3067.49	3631.99	2759.49	3874.07
CR18854_1	707	473.81	608.584	882.776	723.907	1209.26
CR18854_2	442	315.06	420.66	585.931	460.276	783.219
CG4068_3	2009	1383.58	1885.02	2053.67	1618.53	2146.56
CG4068_4	3252	1892.8	2482.04	2830.71	2085.29	3221.59
CR18854_3	1283	940.294	1267.76	1520.12	1343.01	1502.24
CR18854_4	744	526.32	718.447	814.871	732.551	1031.84
CG4068_5	486	306.511	518.959	501.533	347.908	483.238
CG4068_6	617	424.964	575.336	622.794	449.471	674.665
CR18854_5	464	401.762	459.69	532.576	478.643	525.258
CR18854_6	559	424.964	597.019	591.751	606.137	612.802
transposon_1	470	413.974	537.751	487.952	493.77	501.914
transposon_2	459	370.012	562.326	494.743	478.643	519.422
transposon_3	509	454.272	536.305	564.589	545.632	564.945
transposon_4	306	280.867	365.728	336.619	305.77	340.834
transposon_7	193	194.165	203.825	221.179	196.644	235.783
transposon_8	269	200.27	315.134	272.594	276.597	381.688
transposon_9	278	222.251	384.521	309.457	317.655	322.159
transposon_5	366	277.204	378.739	386.093	366.276	424.876
transposon_6	278	245.453	354.164	318.188	311.172	332.664

## Sheet: hen1
siRNA	scr_1	scr_2	scr_3	Hen1_1	hen1_2	hen1_3	hen1dora_1	hen1dora_2	hen1dora_3
CG4068_1	21953	22313.3	36040.9	11635.8	8158.78	9464.94	13312.6	12193	8768.07
CG4068_2	1781	1324.77	3058.28	1289.05	1126.15	1291.31	1881.85	1174.86	1280.53
CG4068_3	2398	1947.48	3711.39	1082.99	655.536	873.174	1055.67	932.258	748.94
CG4068_4	1346	859.875	2242.92	969.324	723.038	928.085	1411.01	1263.85	1116.58
CG4068_5	1171	1150.91	2023.4	539.32	361.282	404.631	680.09	554.588	389.374
CG4068_6	1004	1056.42	1884.33	523.358	347.971	401.03	670.22	616.032	432.224
CR18854_1	2016	2041.02	2110.67	2087.63	1386.66	1438.94	1982.53	2092.28	1541.97
CR18854_2	2319	2400.09	2740.59	1036.56	619.883	714.292	1163.75	1287.68	1009.14
CR18854_3	1256	1235.95	1911.6	1343.7	938.381	1093.72	1667.16	1435.99	1221.53
CR18854_4	978	960.036	1532.55	1439.48	950.265	975.795	1195.34	1314.7	1001.07
CR18854_5	741	818.299	1047.15	778.748	590.885	536.957	662.817	728.856	540.901
CR18854_6	826	938.303	1115.33	764.721	569.969	534.707	716.612	725.678	601.14
transposon_1	824	740.815	785.364	682.493	429.735	542.808	545.849	400.977	535.312
transposon_2	928	887.278	744.46	713.933	468.24	604.02	641.595	478.842	654.547
transposon_3	891	766.328	800.363	482.727	337.038	446.939	544.368	379.259	501.778
transposon_4	737	821.133	685.83	450.32	325.629	373.124	442.7	324.171	400.553
transposon_5	464	409.149	409.044	396.146	257.651	353.32	400.256	305.632	373.849
transposon_6	494	548.052	605.385	466.765	328.956	372.224	465.403	324.701	434.087
transposon_7	609	517.815	538.574	333.266	214.392	283.106	291.679	219.292	276.35
transposon_8	353	467.734	549.482	412.592	296.156	383.026	407.659	234.654	376.333
transposon_9	536	418.599	520.849	347.776	201.557	289.858	310.433	220.882	288.771
