# Supplementary material for: Ago2 protects Drosophila siRNAs and microRNAs from target-directed degradation, even in the absence of 2′-O-methylation
Source: RNA. 2021 Jun;27(6):710–24. doi: 10.1261/rna.078746.121 (PMC8127995; doi:10.1261/rna.078746.121)
Supplement: Supplemental Material [file supp_078746.121_Supplemental_Table_S5.xlsx]

## Sheet: Sheet1
Supplemental Table S5. Oligonucleotides used in this study.
Oligonuclotide	Sequence	Comments
sgRNA_seq_primer	GTTCGACTTGCAGCCTGAAATACG	Sequencing primer for sgRNA in pAc-sgRNA-Cas9
Dora_sgRNA1_F	TTCGCGCTGGAGGCTTAGGAGTGC	All guide RNA sequences taken from Viswanatha et al 2018
Dora_sgRNA1_R	AACGCACTCCTAAGCCTCCAGCGC	eLife 2018;7:e36333 DOI: 10.7554/eLife.36333
Dora_sgRNA2_F	TTCGCAGCTCGAACGGTATGTAGG
Dora_sgRNA2_R	AACCCTACATACCGTTCGAGCTGC
Dora_sgRNA3_F	TTCGCATCCGGCTCTACTCCTGTC
Dora_sgRNA3_R	AACGACAGGAGTAGAGCCGGATGC
Scramble_sgRNA1_F	TTCGCTGGGCTACTCCAGTAAGGA
Scramble_sgRNA1_R	AACTCCTTACTGGAGTAGCCCAGC
Scramble_sgRNA2_F	TTCGCAAGCCTCAGGTAGATACAG
Scramble_sgRNA2_R	AACCTGTATCTACCTGAGGCTTGC
Scramble_sgRNA3_F	TTCGTGGTTAGACTACCCCGTGTC
Scramble_sgRNA3_R	AACGACACGGGGTAGTCTAACCAC
S2_Hen1_sgRNA1_F	TTCGTTGACCAAAATGACTGAAAC
S2_Hen1_sgRNA1_R	AACGTTTCAGTCATTTTGGTCAA
S2_Hen1_sgRNA2_F	TTCGTTGCGCCACAATCCAAATTC
S2_Hen1_sgRNA2_R	AACGAATTTGGATTGTGGCGCAA
S2_Hen1_sgRNA3_F	TTCGATTGAGACCATAGAACATAT
S2_Hen1_sgRNA3_R	AACATATGTTCTATGGTCTCAAT
S2_Nbr_sgRNA1_F	TTCGTATACATGTTCCACTTCTCG
S2_Nbr_sgRNA1_R	AACCGAGAAGTGGAACATGTATA
S2_Nbr_sgRNA2_F	TTCGTCTGCGCCAGGAATTTGGAA
S2_Nbr_sgRNA2_R	AACTTCCAAATTCCTGGCGCAGA
S2_Nbr_sgRNA3_F	TTCGACTTGGGAAGCAGTAGGTCG
S2_Nbr_sgRNA3_R	AACCGACCTACTGCTTCCCAAGT
Dora_seq_F1	CCTGGGCTCAAATCCATGCT	Primer to sequence sgRNA-targeting efficiency of Dora sgRNA 2,3
Dora_seq_R1	ATGCAGACAAACGGCGACTA	Primer to sequence sgRNA-targeting efficiency of Dora sgRNA 2,3
Dora_seq_F2	TGGGTGTTGAACAAGCCCTT	Primer to sequence sgRNA-targeting efficiency of Dora sgRNA 1
Dora_seq_R2	GTAGAGCCAGTATGTCCGCC	Primer to sequence sgRNA-targeting efficiency of Dora sgRNA 1
Hen1_Fseq	TTCGTCACGGATTCCAGTGG	Primer to sequence sgRNA-targeting efficiency of Hen1 sgRNAs
Hen1_Rseq	CACCCACATTTCATGCAGCC	Primer to sequence sgRNA-targeting efficiency of Hen1 sgRNAs
Nib_Fseq	AGAGCCACATGTACAACGCA	Primer to sequence sgRNA-targeting efficiency of Nibbler sgRNAs
Nib_Rseq	ACCGACTTCTCCTTGTGCAG	Primer to sequence sgRNA-targeting efficiency of Nibbler sgRNAs
meth_miR7_guide	/5phos/UGGAAGACUAGUGAUUUUGUUGUU-meth	5′ phosphorylated, RNA oligo with a methyl group on the terminal 2′OH
miR7_pass	/5phos/CAAUAAAUCCCUUGUCUUCUUA	5′ phosphorylated, RNA oligo
miR7_guide	/5phos/UGGAAGACUAGUGAUUUUGUUGUU	5′ phosphorylated, RNA oligo
2S_rRNA_depletion	/5BiosG/TCAATGTCGATACAACCCTCAACCATATGTAGTCCAAGCA	Oligo with a 5′ biotin used for subtractive hybridiztion of the 2S rRNA from sRNAseq libraries
18nt_selection_marker	CAUCCAUCCUUGUCAAUC	Size selection marker for sRNAseq
32nt_selection_marker	GGCAUUAACGCGAACUCGGCCUACAAUAGUGA	Size selectionn marker for sRNAseq
5_adaptor	GUUCAGAGUUCUACAGUCCGACGAUCNNNN	5′ adaptor for sRNAseq libraries, N = random nucleotides
3_adaptor	AppNNNNTCGTATGCCGTCTTCTGCTTGddC	3′ adaptor for sRNAseq libraries, App = 5′ adenyl group, N = random nucleotides
RT_primer	CAAGCAGAAGACGGCATA	RT primer for sRNAseq libraries
F_barcoding_primer	AATGATACGGCGACCACCGACAGGTTGGAATTCTCGGGTGCCAAGGAACTCCAGTCACxxxxxxATCCGACAGGTTCAGAGTTCTACAGTCCGA	Forward PCR primer containing the 6nt barcode (x) used for sRNAseq
DME_miR7_Nprobe	UGGAAGACUAGUGAUUUUGUUGU	LNA probe
DME_miR34_Nprobe	CACAACCAGCTAACCACACTGCCA	DNA probe
DME_miR11_Nprobe	GCAAGAACTCAGACTGTGATG	DNA probe
DME_miR277_Nprobe	TGTCGTACCAGATAGTGCATTTA	DNA probe
CG4068_1_Nprobe	GGAGCGAACTTGTTGGAGTCAA	DNA probe
CR18854_1_Nprobe	TTTGATCCATAGTTTCCC	miRcury LNA detection probe (Qiagen)
